# Supplementary material
Source: publisher site journal article supplement (https://www.dovepress.com/article/379252)
Supplement: Supplementary file 1 [file get_supplementary_file.php]

# Supplementary material

*Lechat et al.* All-cause mortality in people with co-occurring insomnia symptoms and sleep apnea: Analysis of the Wisconsin Sleep Cohort

## Methods

The variables used in this study are defined in Supplementary Table 1. Additionally, age, sex and BMI were recorded at the time of the polysomnography study.

Table S1. Variables, items, response options, and links to raw data.

| Variable | Definition/Question | NSRR link |
| --- | --- | --- |
| Difficulty falling asleep | How often, do you have difficulty getting to sleep?  (Never [Never], Rarely [Once a month], Sometimes [1-5 times a month], Often [5-15 times a month], or Almost always [16-30 times a month]) | [ps_diff](https://sleepdata.org/datasets/wsc/variables/ps_diff) |
| Difficulty falling back to sleep after waking up during the night | How often do you wake up during the night and have a hard time getting back to sleep?  (Never [Never], Rarely [Once a month], Sometimes [1-5 times a month], Often [5-15 times a month], or Almost always [16-30 times a month]) | [ps_backsleep](https://sleepdata.org/datasets/wsc/variables/ps_backsleep) |
| Wake up too early | How often do you wake up too early in the morning and can't get back to sleep?  (Never [Never], Rarely [Once a month], Sometimes [1-5 times a month], Often [5-15 times a month], or Almost always [16-30 times a month]) | [ps_tooearly](https://sleepdata.org/datasets/wsc/variables/ps_tooearly) |
| Feeling unrested | How often do you not feel rested during the day no matter how many hours of sleep you had?  (Never [Never], Rarely [Once a month], Sometimes [1-5 times a month], Often [5-15 times a month], or Almost always [16-30 times a month]) | [ps_notrested](https://sleepdata.org/datasets/wsc/variables/ps_notrested) |
| Self-reported use of sedative | Self-reported drugs at PSG visit, open text then grouped according to effect (Yes, no) | [sedative_med](https://sleepdata.org/datasets/wsc/variables/sedative_med) |
| Education survey | Highest level of education completed by the participants | [educ](https://sleepdata.org/datasets/wsc/variables/education_survey1) |
| Smoker | Current, Past or Never Smoker | [smoke_curr](https://sleepdata.org/datasets/wsc/variables/smoker) |
| Alcohol intake | Alcohol consumption, number of beverages per week | [Alcohol_wk](https://sleepdata.org/datasets/wsc/variables/alcohol_wk) |
| Cardiovascular disease | Yes if the participant reported any of the following:  Congestive heart failure, coronary heart disease, atherosclerosis, pacemaker, angioplasty or any heart surgeries | [any_cvd](https://sleepdata.org/datasets/wsc/variables/any_cvd) |
| Hypertension | Self-reported diagnosis by a physician. Please indicate if you have been told by a doctor that you have or have had any of these conditions: High blood pressure or hypertension | [hyp](https://sleepdata.org/datasets/wsc/variables/hypertension_ynd) |
| Diabetes | Self-reported diagnosis by a physician. Please indicate if you have been told by a doctor that you have or have had any of these conditions: Diabetes | [diabetes](https://sleepdata.org/datasets/wsc/variables/diabetes_ynd) |
| Depression medication | Antidepressant, any: Self-reported use | [depmed](https://sleepdata.org/datasets/wsc/variables/depression_med) |
| Depression score | Standardized Zung Depression Scale Total Score (range from 20 to 100) | [zung](https://sleepdata.org/datasets/wsc/variables/zung_index) |
| ESS | Epworth sleepiness scale (range from 0 to 24) | [epworth](https://sleepdata.org/datasets/wsc/variables/ess) |
| Anxiety score | Trait Anxiety Score (range from 20 to 80) | [trait](https://sleepdata.org/datasets/wsc/variables/trait) |
| Treatment status | Self-reported; Treatment for OSA received | [apnea_treated](https://sleepdata.org/datasets/wsc/variables/apnea_treated) |

Supplementary Table 1: Confounders used in this study and their definitions.

## Results

Table S2: Number of participants (number of events) per sleep disorder group using different apnea-hypopnea-index cut-offs.

| **OSA definition** | **Insomnia definition** | **Control** | **Insomnia alone** | **OSA alone** | | **COMISA** |
| --- | --- | --- | --- | --- | --- | --- |
| *AHI ≥ 5 | *DIMS ≥5/month, and/or SH use | 327 (24) | 192 (16) | 381 (34) | | 215 (34) |
| AHI ≥ 10 | *DIMS ≥5/month, and/or SH use | 435 (33) | 268 (25) | 273 (25) | | 139 (25) |
| AHI ≥ 15 | *DIMS ≥5/month, and/or SH use | 524 (36) | 308 (34) | 184 (22) | | 99 (16) |
| *AHI ≥ 5 | DIMS ≥5/month AND daytime impairment, and/or SH use | 437 (32) | 82 (8) | 494 (52) | | 102 (16) |
| *AHI ≥ 5 | DIMS ≥ 15/month, and/or SH use | 442 (33) | 77 (7) | 506 (54) | | 90 (14) |
| *AHI ≥ 5 | DIMS ≥5/month | 354 (27) | 165 (13) | 403 (37) | | 193 (31) |
| AHI ≥ 10 | DIMS ≥5/month | 470 (38) | 233 (20) | 287 (26) | | 125 (24) |
| AHI ≥ 15 | DIMS ≥5/month | 563 (41) | 269 (29) | 194 (23) | | 89 (15) |
| AHI ≥ 5 | *DIMS ≥5/month, and/or SH use | 327 (24) | 192 (16) | asymptomatic | symptomatic | 215 (34) |
| 310 (26) | 71 (8) |
| AHI = apnoea hypopnoea index, COMISA = co-morbid insomnia and sleep apnoea, DIMS = difficulties initiating and/or maintaining sleep, OSA = obstructive sleep apnoea, SH = sedative-hypnotic.  *Primary definition | | | | | | |

Table S3: Associations between sleep disorder group and all-cause mortality. Participant with a baseline polysomnography after 2005 were excluded (N = 132).

|  | **Insomnia symptoms alone** | **OSA alone** | **COMISA** |
| --- | --- | --- | --- |
| Model 1 | 1.26 (0.65, 2.42) | 1.34 (0.78, 2.30) | 2.59 (1.51, 4.44) |
| Model 2 | 1.09 (0.56, 2.11) | 0.95 (0.54, 1.65) | 1.98 (1.14, 3.43) |
| **Model 3*** | 1.11 (0.57, 2.16) | 0.91 (0.51, 1.61) | 1.83 (1.05, 3.22) |
| Model 4 | 1.02 (0.52, 2.00) | 0.90 (0.51, 1.60) | 1.78 (1.01, 3.13) |
| Model 5 | 1.01 (0.51, 2.00) | 0.90 (0.51, 1.61) | 1.69 (0.95, 3.00) |
| Quoted values are Hazard Ratios (and 95% CI) against the reference control group with neither sleep disorders. OSA = Obstructive sleep apnoea; COMISA = co-morbid insomnia and sleep apnoea.  Model 1: Unadjusted  Model 2: Age, sex and educational status  Model 3: Model 2 AND smoking status, alcohol intake and BMI  Model 4: Model 3 AND diabetes, previous CV event, hypertension, total sleep time, any anti-depressants  Model 5: Model 4 AND depression symptoms, anxiety symptoms  *Primary model | | | |

Table S4: Associations between sleep disorder group and all-cause mortality. Participant that died within the first 3 years were excluded (N = 18).

|  | **Insomnia symptoms alone** | **OSA alone** | **COMISA** |
| --- | --- | --- | --- |
| Model 1 | 1.10 (0.56, 2.16) | 1.22 (0.71, 2.11) | 2.27 (1.32, 3.92) |
| Model 2 | 1.00 (0.51, 1.96) | 0.99 (0.57, 1.73) | 1.94 (1.12, 3.37) |
| **Model 3*** | 1.03 (0.52, 2.03) | 0.93 (0.52, 1.64) | 1.73 (0.98, 3.03) |
| Model 4 | 1.02 (0.52, 2.03) | 0.93 (0.52, 1.64) | 1.72 (0.98, 3.03) |
| Model 5 | 1.01 (0.51, 2.00) | 0.93 (0.53, 1.65) | 1.67 (0.94, 2.96) |
| Quoted values are Hazard Ratios (and 95% CI) against the reference control group with neither sleep disorders. OSA = Obstructive sleep apnoea; COMISA = co-morbid insomnia and sleep apnoea.  Model 1: Unadjusted  Model 2: Age, sex and educational status  Model 3: Model 2 AND smoking status, alcohol intake and BMI  Model 4: Model 3 AND diabetes, previous CV event, hypertension, total sleep time, any anti-depressants  Model 5: Model 4 AND depression symptoms, anxiety symptoms  *Primary model | | | |

Table S5: Associations between sleep disorder group and all-cause mortality. Participant that reported sleep apnoea treatment at baseline PSG were excluded (N = 112).

|  | **Insomnia symptoms alone** | **OSA alone** | **COMISA** |
| --- | --- | --- | --- |
| Model 1 | 0.99 (0.50, 1.98) | 1.24 (0.71, 2.16) | 2.19 (1.25, 3.86) |
| Model 2 | 0.88 (0.44, 1.77) | 0.95 (0.54, 1.67) | 1.72 (0.97, 3.06) |
| **Model 3*** | 0.90 (0.45, 1.81) | 0.89 (0.49, 1.62) | 1.54 (0.84, 2.81) |
| Model 4 | 0.89 (0.44, 1.80) | 0.89 (0.49, 1.62) | 1.54 (0.84, 2.80) |
| Model 5 | 0.85 (0.42, 1.72) | 0.88 (0.48, 1.60) | 1.42 (0.77, 2.61) |
| Quoted values are Hazard Ratios (and 95% CI) against the reference control group with neither sleep disorders. OSA = Obstructive sleep apnoea; COMISA = co-morbid insomnia and sleep apnoea.  Model 1: Unadjusted  Model 2: Age, sex and educational status  Model 3: Model 2 AND smoking status, alcohol intake and BMI  Model 4: Model 3 AND diabetes, previous CV event, hypertension, total sleep time, any anti-depressants  Model 5: Model 4 AND depression symptoms, anxiety symptoms  *Primary model | | | |
